# Supplementary material for: Small molecule activation by frustrated Lewis pairs
Source: Royal Society of Chemistry journal article supplement (doi:10.1039/c2dt32525j), 2012-11-14
Supplement: c2dt32525j.pdf [file c2dt32525j.pdf]

## Supporting Information

### Small Molecule Activation by Frustrated Lewis Pairs

Alastair L. Travis, Samantha. C. Binding, Hasna Zaher, Thomas A. Q. Arnold,  
Jean-Charles Buffet, and Dermot O'Hare\*

*Chemistry Research Laboratory, Department of Chemistry, University of Oxford, Mansfield Road,  
Oxford OX1 3TA, United Kingdom. Tel: +44(0) 1865 272686; E-mail: [dermot.ohare@chem.ox.ac.uk](mailto:dermot.ohare@chem.ox.ac.uk)*

## List of Contents

|                                                                     |            |
|---------------------------------------------------------------------|------------|
| <b>1. General Considerations</b>                                    | <b>S3</b>  |
| 1.1 General Details                                                 | S3         |
| 1.2 NMR spectroscopy                                                | S3         |
| 1.3 X-ray crystallography                                           | S3         |
| <b>2. Synthesis</b>                                                 | <b>S4</b>  |
| 2.1 Synthesis of: 2-bromononafluorobiphenyl                         | S4         |
| 2.2 Synthesis of tris(2,2',2''-nonafluorobiphenyl)borane (PBB)      | S4         |
| 2.3 Synthesis of bromopentachlorobenzene                            | S5         |
| 2.4 Synthesis of Tris(pentachlorophenyl)borane (BAr <sup>Cl</sup> ) | S5         |
| 2.5 Synthesis of FLP                                                | S6         |
| <b>3. NMR spectroscopy</b>                                          | <b>S7</b>  |
| 3.1 Reaction using PBB                                              | S7         |
| 3.2 Reaction using BAr <sup>Cl</sup>                                | S9         |
| <b>4. X-ray crystallography</b>                                     | <b>S10</b> |
| <b>5. Formatoborate formations</b>                                  | <b>S12</b> |
| <b>6. References</b>                                                | <b>S14</b> |

## 1. General Considerations

### 1.1 General Details

Air and moisture sensitive reactions were performed on a dual-manifold vacuum/N<sub>2</sub> line using standard Schlenk techniques, or in a N<sub>2</sub> filled MBraun Unilab glovebox. Hexane, pentane, toluene and DCM were dried using a Braun SPS-800 solvent purification system. Et<sub>2</sub>O and THF were dried at reflux over Na/benzophenone and distilled under N<sub>2</sub>. Hexane, pentane and toluene were stored over K mirrors. THF and Et<sub>2</sub>O were stored over activated 3 Å molecular sieves. H<sub>2</sub> gas (>99.95%) was obtained from Sigma Aldrich and passed directly into a dual manifold Schlenk. CO<sub>2</sub> gas (99.99%) was obtained from ARGO International Ltd. and connected directly into a Schlenk line. Toluene-*d*<sub>8</sub> (99.6%) was obtained from Cambridge Isotope Laboratories Inc., dried over K and freeze-pump-thaw degassed (x3). Benzene-*d*<sub>6</sub> (99%) and Chloroform-*d*<sub>1</sub> (99%) were obtained from Goss Scientific, dried over K and preactivated 3 Å molecular sieves respectively, freeze-pump-thaw degassed three times before being vac transferred prior to use. THF-*d*<sub>8</sub> was dried over CaH<sub>2</sub>, freeze-pump-thaw degassed three times before being vac transferred prior to use, and was obtained from Sigma Aldrich. Fe powder was purchased from East Anglia chemicals; MgCO<sub>3</sub>, Na<sub>2</sub>S<sub>2</sub>O<sub>3</sub>, conc. H<sub>2</sub>SO<sub>4</sub> and I<sub>2(s)</sub> from Fischer Scientific; with the remaining chemicals utilised in the preparations below obtained from Sigma Aldrich. All were used as received.

### 1.2 Solution NMR spectroscopy

Solution NMR samples were prepared in the glovebox under N<sub>2</sub> atmosphere in Young's tap NMR tubes, which were subsequently filled by H<sub>2</sub> or CO<sub>2</sub> as appropriate by freeze-pump-thaw cycles (x3). <sup>1</sup>H, <sup>13</sup>C{<sup>1</sup>H}, <sup>11</sup>B, <sup>11</sup>B{<sup>1</sup>H}, <sup>19</sup>F, <sup>31</sup>P and <sup>31</sup>P{<sup>1</sup>H} NMR spectra were recorded on 300 MHz Varian VX-Works spectrometers. All chemical shifts were expressed as δ, in parts per million (ppm), <sup>1</sup>H and <sup>13</sup>C{<sup>1</sup>H} relative to TMS (δ=0), and referenced internally to the residual proton shift in the deuterated solvent used. <sup>11</sup>B{<sup>1</sup>H}, <sup>19</sup>F and <sup>31</sup>P{<sup>1</sup>H} were referenced externally to BF<sub>3</sub>·OEt<sub>2</sub>, CFC<sub>3</sub> and 85% H<sub>3</sub>PO<sub>4</sub> (δ=0), respectively.

### 1.3 Single crystal X-ray diffraction

Crystals were mounted on MiTeGen MicroMants using perfluoropolyether oil, and cooled rapidly to 150 K in a stream of cold nitrogen using an Oxford Cryosystems CRYOSTREAM unit.<sup>1</sup> Data collections were performed using an Enraf-Nonius FR590 KappaCCD diffractometer, utilising graphite-monochromated Mo K<sub>α</sub> X-ray radiation (λ = 0.71073 Å). Raw frame data were collected at 150(2) K using a Nonius Kappa CCD diffractometer, reduced using DENZO-SMN<sup>2</sup> and corrected for absorption using SORTAV.<sup>3</sup> The structure was solved using SuperFlip<sup>4</sup> and refined using full matrix least-squares using CRYSTALS.<sup>5,6</sup> Dihedral angles were calculated using PLATON.<sup>7,8</sup>

## 2. Synthesis of Lewis Acids and FLP

### 2.1 Synthesis of: 2-bromononafluorobiphenyl

Prepared according to literature synthesis.<sup>9</sup>

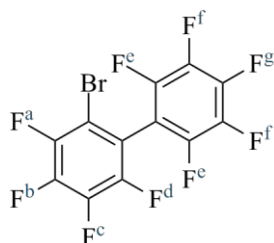

1.1 equivalents of <sup>n</sup>butyllithium (8.09 ml, 22.2 mmol, 2.5 M in hexanes) was added dropwise at  $-78\text{ }^{\circ}\text{C}$  to one equivalent of bromopentafluorobenzene (10.00 g, 5.05 ml, 40.5 mmol) in diethylether (60 ml). The solution was stirred for 16 hours at room temperature, giving a cloudy yellow solution. Removal of the solvent followed by vacuum sublimation at  $60\text{-}65\text{ }^{\circ}\text{C}/10^{-2}$  Torr gave 6.64 g of 2-bromononafluorobiphenyl as a white solid, yield 83%.

$^{19}\text{F}$  NMR:  $\delta$  (ppm), 282.5 MHz  $-126.7$  ( $\text{F}_d$ , d,  $^3J_{\text{F}_d\text{-F}_c} = 23.4$  Hz, 1F),  $-135.0$  ( $\text{F}_a$ , d,  $^3J_{\text{F}_a\text{-F}_b} = 22.7$  Hz, 1F),  $-138.7$  ( $\text{F}_e$ , d,  $^3J_{\text{F}_e\text{-F}_f} = 26.5$  Hz, 2F),  $-148.7$  ( $\text{F}_c$ , td,  $^3J_{\text{F}_c\text{-F}_b,d} = 22.5$  Hz,  $^5J_{\text{F}_c\text{-F}_a} = 5.1$  Hz, 1F),  $-150.1$  ( $\text{F}_g$ , tt,  $^3J_{\text{F}_g\text{-F}_f} = 22.1$  Hz,  $^5J_{\text{F}_c\text{-F}_e} = 3.4$  Hz 1F),  $-154.3$  ( $\text{F}_b$ , td,  $^3J_{\text{F}_b\text{-F}_a,c} = 22.3$  Hz,  $^5J_{\text{F}_b\text{-F}_d} = 4.5$  Hz, 1F),  $-160.7$  ( $\text{F}_f$ , m, 2F).

### 2.2 Synthesis of tris(2,2',2''-nonafluorobiphenyl)borane (PBB)

Prepared according to the literature procedure.<sup>9</sup>

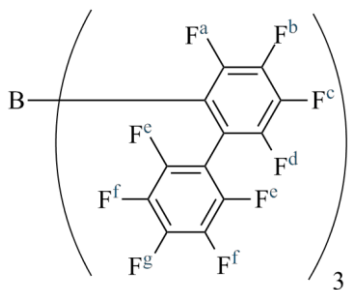

Three equivalents of <sup>n</sup>butyllithium (8.24 ml, 20.6 mmol, 2.5 M in hexane) were added dropwise at  $-78\text{ }^{\circ}\text{C}$  to three equivalents of 2-bromononafluorobenzene (8.10 g, 20.6 mmol) in Et<sub>2</sub>O (80 ml) and pentane (80 ml). The solution was stirred for 2 hours at  $-78\text{ }^{\circ}\text{C}$  before one equivalent of boron trichloride (6.90 ml, 6.9 mmol, 1.0 M in heptane) was added quickly. The solution was stirred for 3 hours at  $-78\text{ }^{\circ}\text{C}$  before slowly raising to room temperature to stir for an additional 64 hours. A colour change from dark green to turquoise to cloudy yellow with blue residue around the Schlenk was observed. The solution was filtered, and then the solvent removed. A vacuum sublimation at  $140\text{ }^{\circ}\text{C}/10^{-2}$  Torr, followed by recrystallisation in pentane yielded 5.29 g of PBB as white crystals, at a yield of 77%.

The solution was filtered, and then the solvent removed. A vacuum sublimation at  $140\text{ }^{\circ}\text{C}/10^{-2}$  Torr, followed by recrystallisation in pentane yielded 5.29 g of PBB as white crystals, at a yield of 77%.

$^{19}\text{F}$  NMR:  $\delta$  (ppm), 282.5 MHz  $-119.9$  ( $\text{F}_d$ , s, 3F),  $-132.0$  ( $\text{F}_a$ , s, 3F),  $-137.4$  ( $\text{F}_e$ , s, 6F),  $-143.2$  ( $\text{F}_c$ , td,  $^3J_{\text{c-b,d}} = 19.0$  Hz,  $^4J_{\text{c-a}} = 8.6$  Hz, 3F),  $149.1$  ( $\text{F}_g$ , t,  $^3J_{\text{g-f}} = 22.8$  Hz, 3F),  $-150.5$  ( $\text{F}_b$ , td,  $^3J_{\text{b-a,c}} = 22.3$  Hz,  $^5J_{\text{b-d}} = 6.0$  Hz, 3F),  $160.6$  ( $\text{F}_f$ , t,  $^3J_{\text{f-e,g}} = 19.9$  Hz, 6F).  $^{11}\text{B}\{^1\text{H}\}$  NMR:  $\delta$  (ppm), 96.2 MHz 70.9 (br).  $^{13}\text{C}$  NMR{ $^1\text{H}$ }:  $\delta$  (ppm) 75.51 MHz 152.01 (s), 148.48 (s), 147.27 (s), 145.40 (s), 138.80 (s), 135.36 (s), 123.84 (s), 113.33 (s), 105.94 (s).

### 2.3 Synthesis of bromopentachlorobenzene

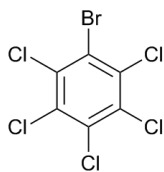

Prepared according to synthesis reported.<sup>10</sup> Bromine (4.00 ml, 77.7 mmol), oleum (50 ml), I<sub>2</sub> (220 mg), and Fe powder (220 mg) were added to pentachlorobenzene (10.00 g, 39.9 mmol) in a round bottomed flask which was heated to 70 °C, and left to cool overnight. The resulting suspension filtered, leaving behind a grey solid that was then washed with saturated solutions of NaS<sub>2</sub>O<sub>3</sub> (aq) and MgCO<sub>3</sub> (aq). This solid was dried overnight before being dissolved in two litres of hot hexane, filtered before being dried under roto-evap, leaving white crystals which were recrystallised from one litre of hot toluene leaving white crystalline bromopentachlorobenzene (8.41 g, 64% yield).

<sup>13</sup>C{<sup>1</sup>H} NMR: δ (ppm), 75.51 MHz 134.2 (s), 133.0 (s), 132.0 (s), 123.8 (s).

### 2.4 Synthesis of Tris(pentachlorophenyl)borane (BAr<sup>Cl</sup>)

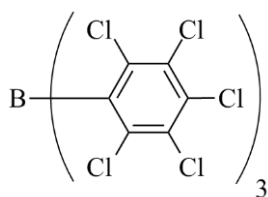

3.3 equivalents of <sup>n</sup>Butyllithium (5.35 ml, 13.3 mmol) were added to three equivalents of bromopentachlorobenzene (4.00 g, 12.1 mmol) in diethyl ether (140 ml) at -78 °C. The solution was stirred for 10 minutes before warming gradually to -10 °C until no more bromopentachlorobenzene was visible, and the solution was a clear orange colour. The Schlenk was cooled back down to -78 °C before one equivalent of boron trichloride was added (4.00 ml, 4.00 mmol) and the Schlenk left to gradually approach room temperature and stir for a further 16 hours. The resulting cloudy orange liquid was quenched with 0.5 ml of cold water before having solvent removed. The resulting solid was dissolved in DCM and filtered through Celite before removing the solvent again. Recrystallisation in two litres of hot toluene left 1.78 g of orange microcrystals of BAr<sup>Cl</sup>, Yield 58%.

<sup>11</sup>B{<sup>1</sup>H} NMR: δ (ppm) 96.2 MHz 69.5 (br, s) <sup>13</sup>C{<sup>1</sup>H} NMR: δ (ppm), 75.51 MHz 140.5 (br, *ipso*-C<sub>6</sub>Cl<sub>5</sub>); 136.5 (s, *para*-C<sub>6</sub>Cl<sub>5</sub>); 134.8 132.6 (both s, *meta*-C<sub>6</sub>Cl<sub>5</sub> and *ortho*-C<sub>6</sub>Cl<sub>5</sub>).

## 2.5 Synthesis of FLP

**Table S1:** Specific reactant amounts used in the preparation of PBB based FLP.

| Frustrated Lewis Pair                       | Borane                 | Phosphine                                                    |
|---------------------------------------------|------------------------|--------------------------------------------------------------|
| PBB/P( <i>p</i> -tolyl) <sub>3</sub>        | PBB (31.4 μmol, 30 mg) | P( <i>p</i> -tolyl) <sub>3</sub> (31.4 μmol, 8.23 mg)        |
| PBB/P(Et) <sub>3</sub>                      | PBB (31.4 μmol, 30 mg) | P(Et) <sub>3</sub> (31.4 μmol, 4.62 μl)                      |
| PBB/P( <sup><i>n</i></sup> Bu) <sub>3</sub> | PBB (31.4 μmol, 30 mg) | P( <sup><i>n</i></sup> Bu) <sub>3</sub> (31.4 μmol, 7.74 μl) |
| PBB/P( <sup><i>t</i></sup> Bu) <sub>3</sub> | PBB (31.4 μmol, 30 mg) | P( <sup><i>t</i></sup> Bu) <sub>3</sub> (31.4 μmol, 6.35 mg) |
| PBB/P(Cy) <sub>3</sub>                      | PBB (31.4 μmol, 30 mg) | P(Cy) <sub>3</sub> (31.4 μmol, 8.80 mg)                      |

**Table S2:** Specific reactant amounts used in the preparation of BAr<sup>Cl</sup> based FLP.

| Frustrated Lewis Pair                                      | Borane                               | Phosphine                                                    |
|------------------------------------------------------------|--------------------------------------|--------------------------------------------------------------|
| BAr <sup>Cl</sup> /P( <i>p</i> -tolyl) <sub>3</sub>        | BAr <sup>Cl</sup> (32.9 μmol, 25 mg) | P( <i>p</i> -tolyl) <sub>3</sub> (32.9 μmol, 10.0 mg)        |
| BAr <sup>Cl</sup> /P(Et) <sub>3</sub>                      | BAr <sup>Cl</sup> (32.9 μmol, 25 mg) | P(Et) <sub>3</sub> (32.9 μmol, 4.85 μl)                      |
| BAr <sup>Cl</sup> /P( <sup><i>n</i></sup> Bu) <sub>3</sub> | BAr <sup>Cl</sup> (32.9 μmol, 25 mg) | P( <sup><i>n</i></sup> Bu) <sub>3</sub> (32.9 μmol, 8.26 μl) |
| BAr <sup>Cl</sup> /P( <sup><i>t</i></sup> Bu) <sub>3</sub> | BAr <sup>Cl</sup> (32.9 μmol, 25 mg) | P( <sup><i>t</i></sup> Bu) <sub>3</sub> (32.9 μmol, 6.67 μl) |
| BAr <sup>Cl</sup> /P(Cy) <sub>3</sub>                      | BAr <sup>Cl</sup> (32.9 μmol, 25 mg) | P(Cy) <sub>3</sub> (32.9 μmol, 9.24 μl)                      |

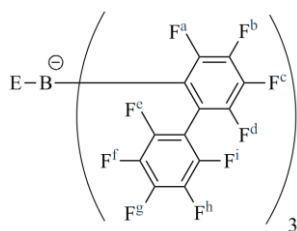

In the case of adducts of PBB where fluorine positions can be assigned, they are done so according to the convention.

**Table S3:** Reaction conditions for the hydrogenation reactions of BAr<sup>Cl</sup> FLP systems.

| Frustrated Lewis Pair                                    | Time heated at 90 °C                                      |
|----------------------------------------------------------|-----------------------------------------------------------|
| BAr <sup>Cl</sup> /P( <i>p</i> -tolyl) <sub>3</sub>      | 60 hours at 90 °C, 24 hours at 120 °C, 48 hours at 140 °C |
| BAr <sup>Cl</sup> /PEt <sub>3</sub>                      | 48 hours at 90 °C                                         |
| BAr <sup>Cl</sup> /P <sup><i>n</i></sup> Bu <sub>3</sub> | 48 hours at 90 °C                                         |
| BAr <sup>Cl</sup> /P <sup><i>t</i></sup> Bu <sub>3</sub> | 52 hours at 90 °C                                         |
| BAr <sup>Cl</sup> /PCy <sub>3</sub>                      | 40 hours at 90 °C                                         |

### 3. NMR Spectroscopy

#### 3.1 Reactions using PBB

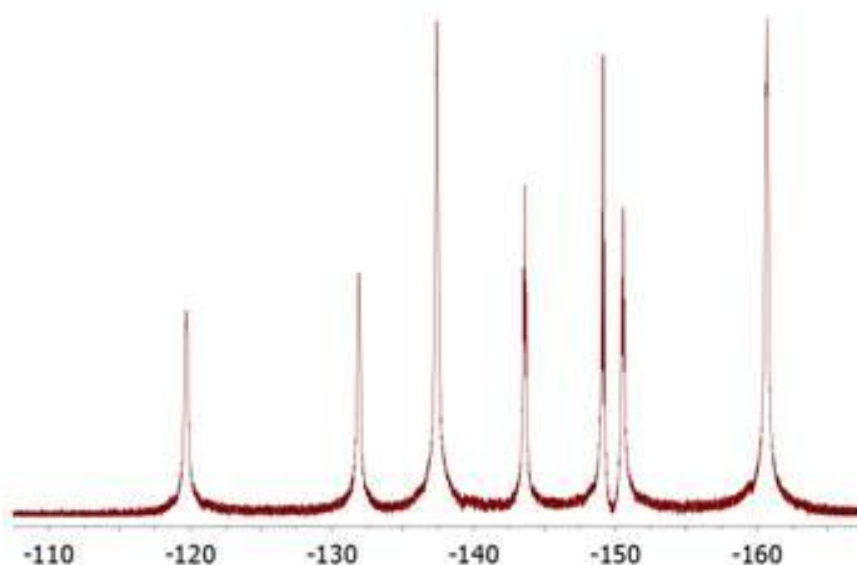

**Figure S1.**  $^{19}\text{F}$  of PBB.

**Table S4.** Chemical shift from the reaction of PBB with phosphines.

|                              | $\Delta\delta^{31}\text{P}\{^1\text{H}\}^{\text{a}}$ (ppm) | $^{11}\text{B}\{^1\text{H}\}$ after reaction (ppm) | Observations          | Adduct / FLP formed |
|------------------------------|------------------------------------------------------------|----------------------------------------------------|-----------------------|---------------------|
| $\text{P}(p\text{-tolyl})_3$ | + 22.1                                                     | 0.8                                                | Forms deep red oil    | Adduct              |
| $\text{P}(\text{Et})_3$      | + 57.6                                                     | 0.4                                                | Forms orange oil      | Adduct              |
| $\text{P}(^n\text{Bu})_3$    | + 64.4                                                     | 0.5                                                | Forms dark grey oil   | Adduct              |
| $\text{P}(^t\text{Bu})_3$    | 0.0                                                        | 70.9                                               | Forms yellow solution | FLP                 |
| $\text{P}(\text{Cy})_3$      | + 29.8                                                     | 0.2                                                | Forms blue-green oil  | Adduct              |

a) Where  $\Delta\delta^{31}\text{P}\{^1\text{H}\} = \delta^{31}\text{P}[\text{after addition of PBB}] - \delta^{31}\text{P}[\text{free phosphine}]$ .

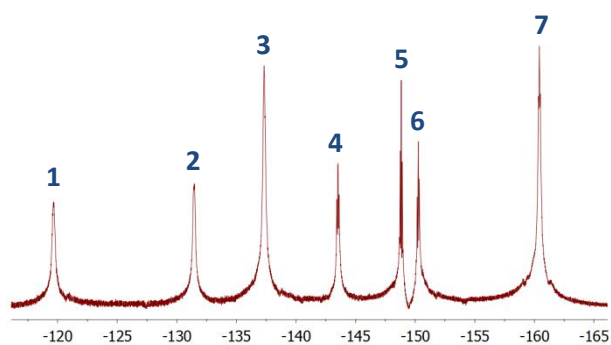

**Figure S2a:**  $^{19}\text{F}$  NMR spectrum of PBB, (toluene- $d_8$ , 25 °C 300 Mhz).

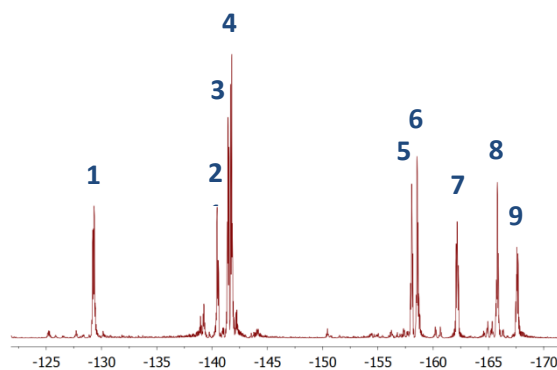

**Figure S2b:**  $^{19}\text{F}$  NMR spectrum of the PBB / P(*p*-tolyl) $_3$  adduct (toluene- $d_8$ , 25 °C 300 Mhz).

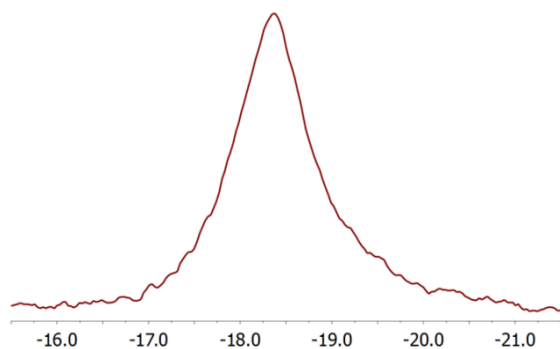

**Figure S3a:**  $^{11}\text{B}\{^1\text{H}\}$  NMR spectrum of using [PBB-H][H-P(*t*Bu) $_3$ ] (toluene- $d_8$ , 25 °C).

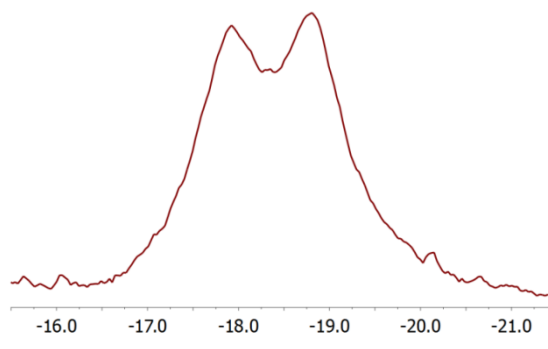

**Figure S3b:**  $^{11}\text{B}$  NMR spectrum of [PBB-H][H-P(*t*Bu) $_3$ ] (toluene- $d_8$ , 25 °C).

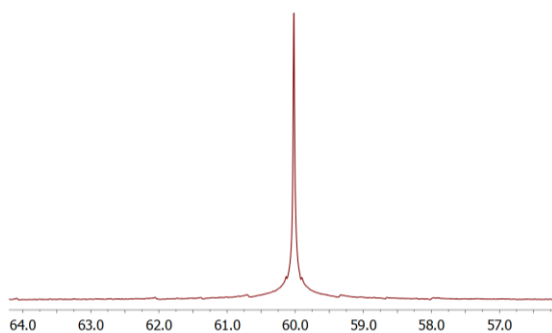

**Figure S4a:**  $^{31}\text{P}\{^1\text{H}\}$  NMR spectrum of [PBB-H][H-P(*t*Bu) $_3$ ] (toluene- $d_8$ , 25 °C).

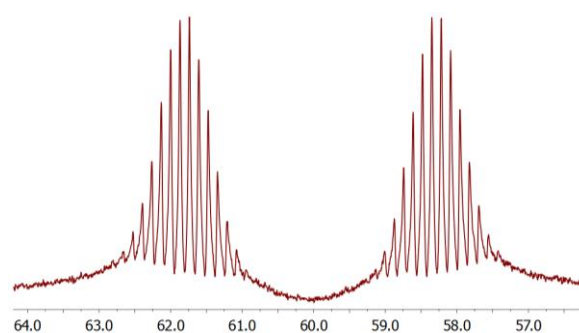

**Figure S4b:** Coupled  $^{31}\text{P}$  NMR spectrum of [PBB-H][H-P(*t*Bu) $_3$ ] (toluene- $d_8$ , 25 °C).



### 3.2 Reactions using BAr<sup>Cl</sup>

**Table S5.** Hydrogen splitting using R<sub>3</sub>P/BAr<sup>Cl</sup>.

|                                         | <sup>11</sup> B resonance                                | <sup>31</sup> P resonance                                | Conclusion                                                             |
|-----------------------------------------|----------------------------------------------------------|----------------------------------------------------------|------------------------------------------------------------------------|
| P( <i>p</i> -tolyl) <sub>3</sub>        | -8.37 ppm,<br>( <sup>1</sup> J <sub>B-H</sub> = 83.0 Hz) | Not observed                                             | Hydride salt observed in low yield after stepwise heating up to 140 °C |
| P(Et) <sub>3</sub>                      | -8.43 ppm,<br>( <sup>1</sup> J <sub>B-H</sub> = 67.8 Hz) | Not observed                                             | Hydride salts formed alongside thermal decomposition products          |
| P( <sup><i>n</i></sup> Bu) <sub>3</sub> | -8.54 ppm<br>( <sup>1</sup> J <sub>B-H</sub> = 81.8 Hz)  | Not observed                                             | Hydride salts formed alongside thermal decomposition products          |
| P( <sup><i>t</i></sup> Bu) <sub>3</sub> | -8.19 ppm<br>( <sup>1</sup> J <sub>B-H</sub> = 77.9 Hz)  | 58.84 ppm<br>( <sup>1</sup> J <sub>P-H</sub> = 445.7 Hz) | 95 % conversion to hydride salt after 56 hours at 90 °C                |
| P(Cy) <sub>3</sub>                      | -8.78 ppm<br>( <sup>1</sup> J <sub>B-H</sub> = 81.4 Hz)  | 32.94 ppm<br>( <sup>1</sup> J <sub>P-H</sub> = 475.3 Hz) | 96 % conversion to hydride salt after 40 hours at 90 °C                |

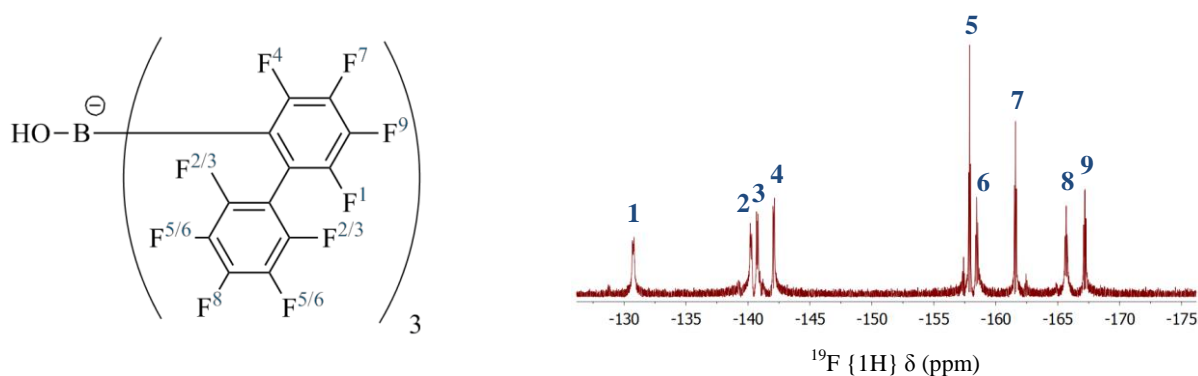

**Figure S5:** The <sup>19</sup>F NMR spectrum of [PBB-OH][H-P(<sup>*t*</sup>Bu)<sub>3</sub>] (toluene-*d*<sub>8</sub>, 25 °C).

## 4. X-ray crystallography

**Table S6.** Selected bond lengths and angles.

|                            | Bond lengths (Å) |
|----------------------------|------------------|
| B-O                        | 1.463(7)         |
| B-C                        | 1.642(3)         |
| C-C between biphenyl rings | 1.490(5)         |
| H to OH (intermolecular)   | 5.787            |

|                                                 | Bond angles (degrees) |
|-------------------------------------------------|-----------------------|
| C-B-C (average)                                 | 113.10(19)            |
| Dihedral angle between biphenyl rings (average) | 77.8(4)               |
| H-P-C (average)                                 | 103.7                 |
| C-B-O                                           | 105.5(2)              |

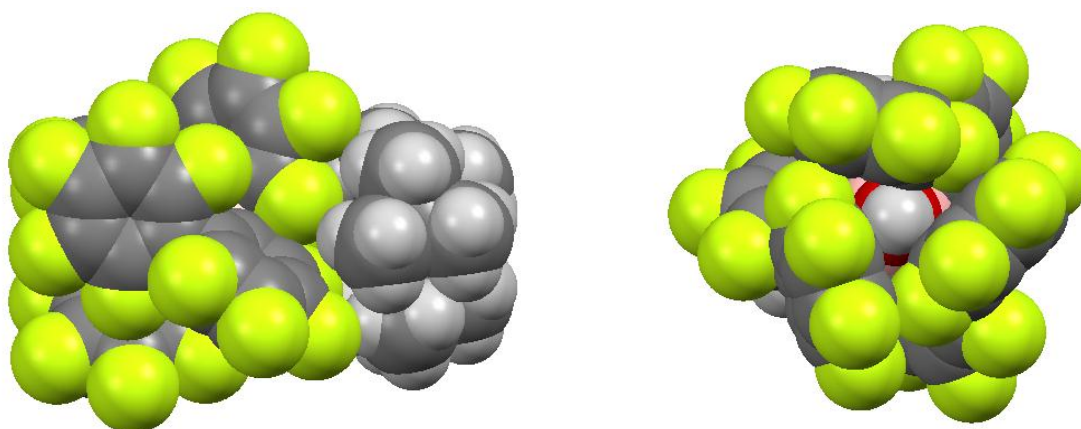

**Figure S6.** Space filling structure of [PBB-OH][H-P'Bu<sub>3</sub>], fluorine (green), carbon (dark grey), hydrogen (light grey), oxygen (red) and boron (pink).

|                                                                                                                | <b>[PBB-OH][HP(t-Bu)3]</b>                          |
|----------------------------------------------------------------------------------------------------------------|-----------------------------------------------------|
| Chemical formula                                                                                               | C <sub>48</sub> H <sub>29</sub> BF <sub>27</sub> OP |
| <i>M<sub>r</sub></i>                                                                                           | 1176.49                                             |
| Crystal system, space group                                                                                    | Trigonal, <i>R</i> 3                                |
| Temperature (K)                                                                                                | 150                                                 |
| <i>a</i> , <i>c</i> (Å)                                                                                        | 16.0095 (3), 15.8189 (4)                            |
| <i>V</i> (Å <sup>3</sup> )                                                                                     | 3511.26 (13)                                        |
| <i>Z</i>                                                                                                       | 3                                                   |
| Radiation type                                                                                                 | Mo <i>K</i> α                                       |
| μ (mm <sup>-1</sup> )                                                                                          | 0.21                                                |
| Crystal size (mm)                                                                                              | 0.35 × 0.20 × 0.16                                  |
| <i>T<sub>min</sub></i> , <i>T<sub>max</sub></i>                                                                | 0.82, 0.97                                          |
| No. of measured, independent and observed reflections                                                          | 19434, 3541, 2478 { <i>I</i> > 2.0σ( <i>I</i> )}    |
| <i>R<sub>int</sub></i>                                                                                         | 0.065                                               |
| (sin θ/λ) <sub>max</sub> (Å <sup>-1</sup> )                                                                    | 0.649                                               |
| Refinement                                                                                                     |                                                     |
| <i>R</i> [ <i>F</i> <sup>2</sup> > 2σ( <i>F</i> <sup>2</sup> )], <i>wR</i> ( <i>F</i> <sup>2</sup> ), <i>S</i> | 0.042, 0.106, 0.97                                  |
| No. of reflections                                                                                             | 3541                                                |
| No. of parameters                                                                                              | 241                                                 |
| No. of restraints                                                                                              | 7                                                   |
| Δρ <sub>max</sub> , Δρ <sub>min</sub> (e Å <sup>-3</sup> )                                                     | 0.58, -0.55                                         |

## 5. Formatoborate formation

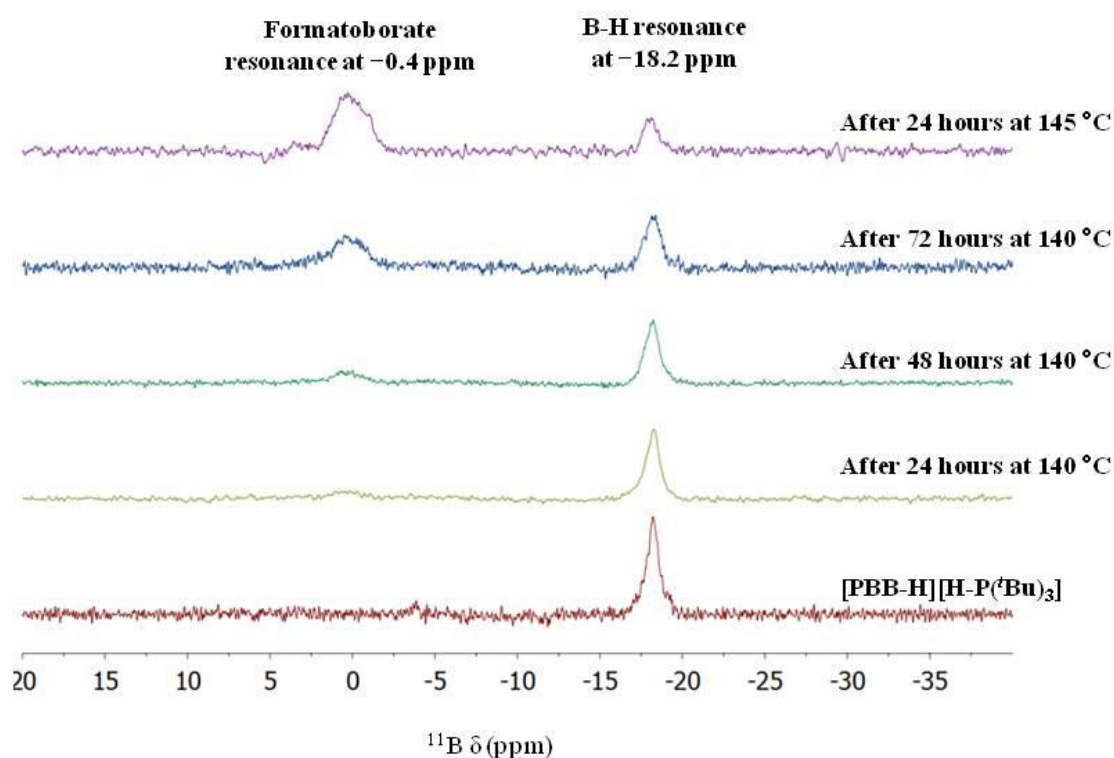

**Figure S7.**  $^{11}\text{B}$  NMR spectrum of the formation of  $[\text{PBB-OC(O)-H}][\text{H-P}(\text{tBu})_3]$  via  $\text{CO}_2$  inserting into  $[\text{PBB-H}][\text{H-P}(\text{tBu})_3]$ , (toluene- $d_8$ ,  $25^\circ\text{C}$ ).

**Table S7.** Summary of the reactivity of  $[\text{BAR}^{\text{Cl}}\text{-H}][\text{H-phosphine}]$  systems with  $\text{CO}_2$  via route A.

|                              | Reactivity with $\text{H}_2$                    | Thermal decomposition of Hydride? | Formatoborate observed? | Reversible loss of $\text{H}_2$ ? |
|------------------------------|-------------------------------------------------|-----------------------------------|-------------------------|-----------------------------------|
| $\text{P}(p\text{-tolyl})_3$ | Hydride salt produced in low yield              | No                                | No                      | No                                |
| $\text{P}(\text{Et})_3$      | Hydride salt produced, along with side products | Yes                               | -                       | -                                 |
| $\text{P}(\text{tBu})_3$     | Hydride salt produced, along with side products | Yes                               | -                       | -                                 |
| $\text{P}(\text{tBu})_3$     | Hydride salt produced in 96 % yield             | No                                | No                      | Yes                               |
| $\text{P}(\text{Cy})_3$      | Hydride salt produced in 95% yield              | No                                | No                      | No                                |

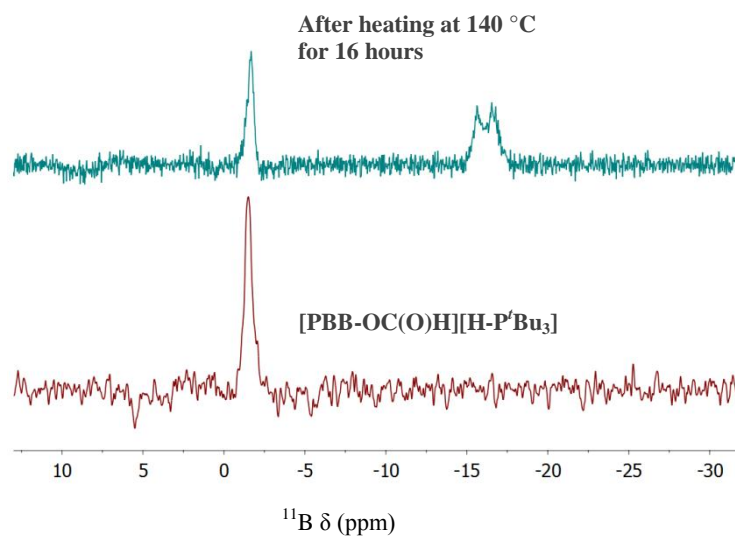

**Figure S8.** Formation of methoxyborate.

## 6. References

- 1 J. Cosier and A. M. Glazer, *J. Appl. Cryst.*, 1986, **19**, 105.
- 2 Z. Otwinowski and W. Minor, *Methods Enzymol.*, 1997, **276**, 307.
- 3 R. H. Blessing, *Acta Cryst.* 1995, **A51**, 33.
- 4 L. Palatinus and G. Chapuis, *J. Appl. Cryst.*, 2007, **40**, 786.
- 5 P. W. Betteridge and J. R. Carruthers, R. I. Cooper, K. Prout, and D. J. Watkin, *J. Appl. Cryst.* 2003, **36**, 1487.
- 6 R. I. Cooper, A. L. Thompson and D. J. Watkin, *J. Appl. Cryst.*, 2010, **43**, 1100
- 7 A. L. Spek, PLATON, A Multipurpose Crystallographic Tool, Utrecht, the Netherlands, 1998.
- 8 A. Spek, *J. Appl. Crystallogr.*, 2003, **36**, 7
- 9 Y. X. Chen, M. V. Metz, L. Li, C. L.; Stern, T. J. Marks, *J. Am. Chem. Soc.*, 1998, **120**, 6287.
- 10 H. Zaher, PhD Thesis, University of Oxford, 2012.
